1 **Interleukin-17A causes osteoarthritis-like transcriptional changes**  
2 **in human osteoarthritis-derived chondrocytes and synovial**  
3 **fibroblasts *in vitro***

4  
5 **Jolet Y. Mimpfen<sup>1\*</sup>, Mathew J. Baldwin<sup>1</sup>, Adam P. Cribbs<sup>1</sup>, Martin Philpott<sup>1</sup>, Andrew J.**  
6 **Carr<sup>1</sup>, Stephanie G. Dakin<sup>1</sup>, Sarah J.B. Snelling<sup>1</sup>**

7 <sup>1</sup> *The Botnar Research Centre, Nuffield Department of Orthopaedics Rheumatology and*  
8 *Musculoskeletal Science, University of Oxford, Oxford, OX3 7LD, UK*

9  
10 **\* Correspondence:**

11 Dr Jolet Mimpfen

12 [jolet.mimpfen@ndorms.ox.ac.uk](mailto:jolet.mimpfen@ndorms.ox.ac.uk)

13  
14 **Keywords:** osteoarthritis, interleukin-17, cartilage, synovium, inflammation

15 **Abstract**

16 Increased interleukin (IL)-17A has been identified in joints affected by osteoarthritis (OA),  
17 but it is unclear how IL-17A, and its family members IL-17AF and IL-17F, can contribute to  
18 human OA pathophysiology. Therefore, we aimed to evaluate the gene expression and  
19 signalling pathway activation effects of the different IL-17 family members in fibroblasts  
20 derived from cartilage and synovium of patients with end-stage knee OA.  
21 Immunohistochemistry staining confirmed that IL-17 receptors A (IL-17RA) and IL-17RC  
22 are expressed in end-stage OA-derived cartilage and synovium. Chondrocytes and synovial  
23 fibroblasts derived from end-stage OA patients were treated with IL-17A, IL-17AF, or IL-  
24 17F, and gene expression was assessed with bulk RNA-Seq. Hallmark pathway analysis  
25 showed that IL-17 cytokines regulated several OA pathophysiology-related pathways  
26 including immune-, angiogenesis-, and complement-pathways in both chondrocytes and  
27 synovial fibroblasts derived from end-stage OA patients. While overall IL-17A induced the  
28 strongest transcriptional response, followed by IL-17AF and IL-17F, not all genes followed  
29 this pattern. Disease-Gene Network analysis revealed that IL-17A-related changes in gene  
30 expression in these cells are associated with experimental arthritis, knee arthritis, and  
31 musculoskeletal disease gene-sets. Western blot analysis confirmed that IL-17A significantly  
32 activates p38 and p65 NF- $\kappa$ B. Incubation of chondrocytes and synovial fibroblasts with IL-  
33 17A antibody secukinumab significantly inhibited IL-17A-induced gene expression. In  
34 conclusion, the association of IL-17-induced transcriptional changes with arthritic gene-sets  
35 supports a role for IL-17A in OA pathophysiology. Therefore, secukinumab could be  
36 investigated as a potential therapeutic option in OA patients.

## 37 **1 Introduction**

38 Osteoarthritis (OA) is the most common musculoskeletal disease, affecting 8.75 million  
39 people in the UK alone. Characterised by the loss of articular cartilage, it causes pain,  
40 disability, a reduced quality of life, and has a significant socioeconomic impact[1]. There are  
41 currently no disease-modifying treatments for OA and treatment is limited to joint  
42 replacement surgery with its associated costs and morbidity. OA is a multifactorial disease  
43 with a complex pathophysiology[1, 2]. Newly gained knowledge on the pathophysiology of  
44 osteoarthritis (OA) has shifted the traditional dogma of OA as a degenerative “wear-and-tear”  
45 disease of the articular cartilage to a hypothesis that OA is a whole joint disease with a  
46 significant inflammatory component.

47  
48 Despite the loss of articular cartilage being hallmark feature of OA, the mechanisms  
49 underlying this OA-related cartilage degradation are poorly understood. Histological analyses  
50 have shown a clear infiltration of inflammatory cells into the synovium. Molecular  
51 interrogation has shown complement pathway activation in cartilage, synovium, and synovial  
52 fluid , and an increase in inflammatory mediators in synovium and synovial fluid[3–5]. Many  
53 of these mediators are hypothesized to be (over)produced by the resident stromal cells -  
54 chondrocytes in cartilage and synovial fibroblasts in synovium[5]. In addition, there is  
55 evidence for angiogenesis in OA cartilage, subchondral bone, synovium, and menisci[6, 7].

56  
57 The IL-17 family of cytokines is increasingly identified as a contributor to OA pathogenesis.  
58 IL-17 is a family of 6 cytokines (IL-17A-F), from which homodimers IL-17A, IL-17F and  
59 their heterodimer IL-17AF are most studied[8–11]. IL-17A has been found in increased  
60 concentrations in serum and synovial fluid from OA patients compared to healthy controls,  
61 showing positive correlations with different pain, function, and disease severity scores[12–  
62 15]. When comparing inflamed with non-inflamed synovium from OA patients, an increased  
63 concentration of IL-17A was found in inflamed OA tissue, correlating with the release of IL-  
64 6, IL-23, and TGF- $\beta$ 1[16]. Another study identified a subgroup of patients with high IL-17A  
65 in their synovial fluid, alongside higher concentrations of inflammatory mediators (including  
66 IL-6, leptin, resistin, CCL7, and NGF), and reduced osteophytes, sclerosis, and minimum  
67 joint space width, thereby describing a potential inflammatory OA phenotype[17]. Genetic  
68 associations between polymorphisms in IL-17 genes and OA have been reported in different  
69 populations[18, 19]. Several animal models have studied the role of IL-17A and its receptors

70 in (inflammatory) arthritis; injection of IL-17A induced the manifestations of OA in a rabbit  
71 model[20].

72

73 IL-17A, IL-17F, and IL-17AF all signal through the same heterometric receptor complex,  
74 which consists of IL-17 receptor A (IL-17RA) and IL-17RC[21, 22]. Both of these receptor  
75 subunits are essential for IL-17A/F signalling. While these cytokines seem to induce  
76 qualitatively similar signals, IL-17A homodimer produces a much more potent signal than the  
77 IL-17F homodimer in human primary foreskin fibroblasts and mouse embryonic fibroblasts,  
78 with the IL-17AF heterodimer producing an intermediate signal[11, 23, 24]. IL-17RA is  
79 expressed by nearly every cell type of the body with particularly high expression on immune  
80 cells, in contrast, IL-17RC is mostly expressed by non-immune cells, thereby mainly limiting  
81 IL-17 signalling to non-hematopoietic epithelial and stromal cells[22, 25]. However, IL-17-  
82 induced effects can differ between cell types, underlining the importance of studying its  
83 effects in each specific cell type or organ system[26, 27].

84

85 Although a growing number of clinical, animal, and genetic studies have identified a  
86 potential role for IL-17 in OA, the molecular mechanisms underpinning its role in OA  
87 pathophysiology is unknown. In cells from end-stage OA patients, IL-17A can increase the  
88 gene or protein expression of selected inflammatory mediators, including IL-6, IL-8, CXCL1,  
89 CCL2, COX2, and iNOS[28, 29]. In addition, IL-17A has been shown to affect ECM by  
90 increasing MMP production[30]. However, the individual effects of IL-17A, IL-17F, and IL-  
91 17AF in cells derived from OA patients throughout the whole transcriptome remain  
92 understudied. Therefore, this study aimed to identify and compare the changes in gene  
93 expression and activation of intracellular signalling pathways induced by IL-17A, IL-17F,  
94 and IL-17AF in chondrocytes and synovial fibroblasts derived from patients with end-stage  
95 knee OA. A better understanding of the similarities and differences of the effects of these  
96 three IL-17 cytokines in OA-derived primary cells will provide critical insight to their  
97 contribution to OA pathogenesis.

## 98 2 Materials and methods

99

### 100 2.1 Ethics approval

101 Ethical approval was granted for the Oxford Musculoskeletal Biobank (09/H0606/11) and  
102 (19/SC/0134) by the local research ethics committee (Oxford Research Ethics Committee B)  
103 for all work on human cartilage and human synovium, and informed consent was obtained  
104 from all patients according to the Declaration of Helsinki.

105

### 106 2.2 Immunohistochemistry

107 Cartilage and synovial tissue from end-stage OA patients was collected during total knee  
108 replacement surgery. Cartilage was dissected from the tibial plateau. Cartilage and synovial  
109 samples were immersed in 10% formalin for 0.5 mm/hour, embedded in paraffin before  
110 cutting 5µm sections and baking onto adhesive glass slides. Deparaffinisation and antigen  
111 retrieval procedure was performed using a PT Link machine (Dako, Glostrup, Demark) using  
112 FLEX TRS antigen retrieval fluid (Dako). Immunostaining was performed using an  
113 Autostainer Link 48 machine using the EnVision FLEX visualisation system (Dako) with  
114 anti-human IL-17RA, anti-human IL-17RC antibodies (R&D systems, Abingdon, UK) or  
115 universal negative control mouse (Dako) (Supplementary Table 1). Antibody binding was  
116 visualized by FLEX 3,3'-diaminobenzidine (DAB) substrate working solution and  
117 haematoxylin counterstain (Dako) following the protocols provided by the manufacturer.  
118 Antibodies were validated in-house to determine the concentration of antibody needed for  
119 positive staining with minimal artefact from the tissue. After staining, slides were dehydrated  
120 before mounting using Pertex mounting medium (Histolab, Gothenburg, Sweden). Negative  
121 controls are provided in Supplementary Fig. 1.

122

### 123 2.3 Isolation of primary OA chondrocytes and synovial fibroblasts for in vitro 124 culture

125 Tissue from end-stage OA patients was collected during total knee replacement surgery.  
126 Cartilage was dissected from the tibial plateau and minced before overnight collagenase  
127 digestion in DMEM-F12 supplemented with 1% P/S and 1mg/ml collagenase IA (Sigma,  
128 supplied by Merck, Darmstadt, Germany). Synovium was minced before being collagenase  
129 digested for 2 hours. Collagenase-digested tissue was filtered through a 70µm cell strainer,  
130 and cells were plated out in 10-cm dishes in D10 (DMEM-F12 (Gibco, supplied by Fisher

131 Scientific, Loughborough, UK) with 10% Foetal Bovine Serum (FBS) (Labtech International,  
132 Heathfield, UK) and 1% Penicillin/Streptomycin (P/S) (Gibco)). Once 95% confluent,  
133 chondrocytes were cryopreserved, while synovial fibroblasts were passaged once (p=1) and  
134 then cryopreserved.

135

#### 136 **2.4 Cell culture for RNA Sequencing**

137 Chondrocytes (n=6 patients) were expanded to p=2 and synovial fibroblasts (n=6 patients) to  
138 p=3 in D10 after which they were plated out in 12-well plates. Cells were left to attach for 24  
139 hours, before medium was changed to serum-free DMEM-F12 with P/S (D0) and left for 24  
140 hours. On the day of the experiments, vehicle control, and 10ng/ml IL-17A, IL-17F, or IL-  
141 17AF (all from Biolegend UK Ltd, London, UK) was made up in D0. Old D0 was removed  
142 and D0 with vehicle control or IL-17 was added. After 24 hours, treatment medium was  
143 removed and cells were washed with PBS, before being harvested in Trizol (Invitrogen,  
144 supplied by ThermoFisher Scientific, Waltham, MA, USA), and stored at -80°C.

145

#### 146 **2.5 Bulk RNA Sequencing**

147 RNA was extracted using a Direct-zol MicroPrep kit with DNase treatment (Zymo Research,  
148 Irvine, CA, USA) following the manufacturer's instructions. RNA concentration was  
149 measured using a NanoDrop spectrophotometer. RNA quality of eight randomly chosen  
150 samples were assessed using High Sensitivity RNA ScreenTapes (Agilent) on an Agilent  
151 2200 TapeStation. Library preparation was done using a NEBNext Ultra II Directional RNA  
152 Library Prep Kit for Illumina with poly-A selection (Illumina, San Diego, CA, USA)  
153 following the manufacturer's instructions. Every library was quantified for DNA content with  
154 High Sensitivity DNA ScreenTapes (Agilent). Libraries from 24 samples with unique  
155 identifiers were pooled and run on an Illumina NextSeq 500 using the 75 cycles NextSeq  
156 High Output kit (Illumina).

157

158 Raw FASTQ files containing reads were generated by the Illumina software CASAVA v1.8.  
159 The raw FASTQ files were processed using CGAT-flow readqc and mapping workflows  
160 (<https://github.com/cgat-developers/cgat-flow>)[31]. The quality of the reads was assessed  
161 using FASTQC and ReadQC. Raw reads were aligned to the GRCh38 reference genome  
162 using HiSat2 (v2.0.5). The mapped reads were visualised using IGV (v2.3.74) to further  
163 assess quality of mapping. The quantification of mapped reads against GCRh38 reference

164 genome annotation was carried out using FeatureCounts (v1.5.0). Downstream analyses were  
165 performed using R version 3.5.1 (R Foundation, Vienna, Austria), and RStudio version  
166 1.1.456 (RStudio, Boston, MA, USA). Differential expression analysis was performed using  
167 the DESeq2 package[32] using ‘apeglm’ method to apply the shrinkage of logarithmic fold  
168 change[33]. The adjusted p-value (padj) and significance of changes in gene expression were  
169 determined by applying the Bonferroni-Hochberg correction of 5% false discovery rate. PCA  
170 plots were generated using the package ggplot2[34], heatmaps were generated using the  
171 package pheatmap (PCA and heatmaps in Supplementary Fig. 2 and 3), and  
172 EnhancedVolcano was used to create volcano plots. Gene-set enrichment analysis for  
173 hallmark pathways were performed using clusterProfiler on genes that were significantly  
174 changed compared to control (padj < 0.05) ranked by log2 fold change (LFC)[35]. Disease-  
175 gene network (DisGeNET) analysis was performed using the DOSE package on genes  
176 padj<0.05 and LFC±1[36].

177

## 178 **2.6 Cell culture for western blot**

179 Chondrocytes (n=3) and synovial fibroblasts (n=3) were expanded, seeded in 12-well plates  
180 as described before. On the day of the experiments, vehicle control, IL-17A, IL-17F, and IL-  
181 17AF were diluted in D0 medium to 10ng/ml. Old D0 medium was removed and stimulation  
182 medium was added. Cells were harvested for western blotting 0 mins, 10 mins, 30 mins, 1  
183 hour and 8 hours after treatment commenced as described previously[37], frozen, and stored  
184 at -20°C until analysis.

185

## 186 **2.7 SDS-PAGE and Western blot**

187 Cell lysates were mixed with 2x Laemmli Sample Buffer (Bio-Rad) in a 1-to-1 ratio and  
188 separated by gel electrophoresis in a 10% Mini-PROTEAN TGX Precast gels (Bio-Rad  
189 Watford, UK). After gel electrophoresis, proteins were blotted on PVDF membrane (Bio-  
190 Rad) using a Trans-Blot Turbo Transfer System (Bio-Rad). Membranes were blocked in  
191 blocking buffer (10% milk powder and 2% BSA in TBS-T) and subsequently stained with  
192 loading control (vinculin) and phosphorylated-protein antibody overnight in antibody buffer  
193 (5% BSA and 1% Tween-20 in TBS-T) (Supplementary Table 2). The blots were washed in  
194 TBS-T and incubated in secondary antibody in antibody buffer for 2 hours before washing  
195 again in TBS-T before visualising with ECL (GE Healthcare, Chicago, IL, USA) and  
196 imaging in an ALLIANCE 6.7 Chemiluminescence Imaging System (UVITEC, Cambridge,

197 UK). The membranes were subsequently stripped (Takara BioInc, Kusatsu, Japan), blocked,  
198 and stained with total-protein antibody in antibody buffer overnight. Blots were then washed,  
199 stained with secondary antibody, washed again, and imaged. ImageJ was used to analyse the  
200 intensity of the stained bands for semi-quantitative analysis using the 0h control for each  
201 patient as a reference. Supplementary Fig. 4 shows representative western blots for each  
202 antibody.

## 204 **2.8 Cell culture for inhibitor treatment and cells-to-cDNA synthesis**

205 Chondrocytes and synovial fibroblasts were cultured and plated out in 96-well plates as  
206 described earlier. Secukinumab with 10ng/ml IL-17A or vehicle control was added to the  
207 cells. After 24 hours, cells were washed with PBS before being harvested in cells-to-cDNA  
208 Cell Lysis Buffer (Ambion Inc, Foster City, CA, USA), and transferred to a PCR plate for  
209 cells-to-cDNA synthesis. cDNA was prepared using a cells-to-cDNA kit following the  
210 manufacturer's instructions (Ambion).

## 212 **2.9 Real time quantitative PCR**

213 Real-time quantitative polymerase chain reaction (RT-qPCR) were carried out in a 10 $\mu$ L  
214 volume in 384-well plates using Fast SYBR Green Master Mix (Applied Biosystems, Foster  
215 City, California, USA). Primers (Supplementary Table 3) were purchased from Primerdesign  
216 Ltd (Primerdesign Ltd, Eastleigh, UK). All RT-qPCRs were performed using a ViiA7 (Life  
217 Technologies, Paisley, UK), which included 40 cycles and a melt-curve. Samples were  
218 analysed against two reference genes, glyceraldehyde 3-phosphate dehydrogenase (*GAPDH*)  
219 and  $\beta$ -actin (*ACTB*) (Primerdesign Ltd), using the delta-CT or delta-delta Ct method[38].

## 221 **2.10 Statistical analysis**

222 Statistical analyses for bulk RNA-Seq were performed using R and RStudio. All other  
223 statistical analyses were performed using in GraphPad Prism 8.1.2 (GraphPad Software, La  
224 Jolla, CA, USA). For treatment with IL-17 for western blot analysis, Friedman test with  
225 Dunn's multiple comparisons test was used and data is shown as mean $\pm$ SD. For all  
226 experiments with IL-17A and inhibitors, differences between treatment with IL-17A alone  
227 and other treatments Friedman test with Dunn's test to correct for multiple comparisons,  
228 except when there was missing data in which Kruskal-Wallis test with Dunn's multiple



229 comparisons test was used. All data for inhibitor experiments is shown as the individual  
230 measurements with mean. \* =  $p < 0.05$ , \*\* =  $p < 0.01$ , \*\*\* =  $p < 0.001$ , \*\*\*\* =  $p < 0.0001$ .

231 **3 Results**

232

233 **3.1 IL-17 receptors are expressed by end-stage osteoarthritis chondrocytes and**  
234 **synovial fibroblasts**

235 Cartilage and synovium from end-stage OA patients undergoing total knee replacement  
236 surgery were either formalin-fixed or digested to isolate and expand resident fibroblasts  
237 (chondrocytes and synovial fibroblasts respectively). To validate that these fibroblasts can  
238 respond to IL-17 cytokines, mRNA expression of their receptors *IL17RA* and *IL17RC* was  
239 assessed by RT-qPCR (Fig. 1A). Both genes were expressed by chondrocytes and synovial  
240 fibroblasts, although *IL17RA* was more highly expressed than *IL17RC* with a difference of  
241 2.03 CT (n=5, 0.84-3.18) in chondrocytes and 3.39 CT (n=4, 2.79-4.20) in synovial  
242 fibroblasts. Protein expression of IL-17RA and IL-17RC was confirmed in end-stage OA  
243 cartilage and synovial tissue (Fig. 1B).

244

245 **3.2 IL-17A induces the most potent and greatest changes in gene expression**

246 The transcriptome of sets of samples (24 samples of chondrocytes and 24 samples of synovial  
247 fibroblasts representing n=6 patients, treated for 24 hours with vehicle control, or IL-17A, IL-  
248 17F, or IL-17AF, all at 10 ng/ml) were analysed using poly-A tail selected, mRNA  
249 sequencing. After normalisation and accounting for donor variability, log-fold2 (LFC)  
250 changes were calculated with the adjusted p<0.05. Treatment with IL-17 cytokines  
251 significantly changed a range of genes compared to control (Fig. 2). The number of changed  
252 genes that were changed at least LFC±1 varied by IL-17 treatment type, with the highest  
253 number changed by IL-17A (856 genes for chondrocytes, 330 for synovial fibroblasts),  
254 followed by IL-17AF (188 genes/55 genes), and finally IL-17F (39 genes/17 genes) (full list  
255 in Supplementary Tables 4 and 5; all volcano plots in Supplementary Fig. 5 and 6). The most  
256 significantly changed gene in both cell types by all three IL-17 cytokines was *NFKBIZ*, a  
257 gene that encodes for the protein “Inhibitor of NF-κB Zeta” (IκBζ), a central regulator of IL-  
258 17 signalling. The three most highly regulated genes by IL-17A were *CCL20*, *IL6*, and *NOS2*  
259 in chondrocytes, and *CSF3*, *CXCL1*, and *CCL20* in synovial fibroblasts, which are known IL-  
260 17-induced genes.

261

262 Overall, IL-17A induced the strongest transcriptional response, followed by IL-17AF, and  
263 finally IL-17F. For 81% of these genes in chondrocytes and 91% in synovial fibroblasts, the  
264 differences in transcriptional response between IL-17AF and IL-17A were larger than

265 between IL-17AF and IL-17F. Therefore, IL-17AF-induced gene expression changes more  
266 closely resemble IL-17F-induced effects than IL-17A-induced effects. However, not all genes  
267 followed this pattern. For example, while IL-17A, IL-17AF, and IL-17F all induced a similar  
268 increase in *NFKBIZ* in synovial fibroblasts (padj=2.09E-163, LFC of 3.68, 3.03, and 2.95  
269 respectively), only IL-17A induced the expression of *CCL20* (padj=3.46E-15, LFC of 6.25,  
270 0.07, and 0.02, respectively), and only IL-17A and IL-17AF were induced the expression of  
271 *CSF3* (padj=8.69E-18, LFC of 8.82, 5.97, and 0.02, respectively). In addition, some genes  
272 were only expressed and strongly increased in either chondrocytes (*NOS2*, padj=7.49E-36,  
273 LFC 7.42, 5.15, and 4.31, respectively) or synovial fibroblasts (*CSF3* as described above),  
274 showing that IL-17 cytokine culture can induce transcriptional responses that are cell type  
275 dependent.

276

### 277 **3.3 IL-17A treatment causes changes in inflammation-related biological pathways**

278 To elucidate the biological processes that are affected by IL-17 in chondrocytes and synovial  
279 fibroblasts, the dataset was analysed using the Gene Set Enrichment Analysis (GSEA)  
280 hallmark gene set. The GSEA is a collection of 50 hallmark gene pathways which condense  
281 information from over 4,000 original overlapping gene sets from specific collections[39]. In  
282 chondrocytes, 21, 24, and 21 pathways were significantly changed by treatment with IL-17A,  
283 IL-17AF, and IL-17F, respectively. In synovial fibroblasts, IL-17 cytokines caused  
284 significant changes in 20, 14, and 11 pathways after treatment with IL-17A, IL-17F, and IL-  
285 17AF, respectively. Generally, the largest changes were made by IL-17A, followed by IL-  
286 17AF, and finally IL-17F (Fig. 3A-B, Supplementary Table 6). Pathways including  
287 inflammatory responses, complement, hypoxia, angiogenesis, and glycolysis were changed in  
288 both chondrocytes and synovial fibroblasts and have been linked to OA pathophysiology.

289

### 290 **3.4 IL-17A induced changes are associated with experimental arthritis**

291 Disease-gene network (DisGeNET) analysis was used to study the gene-disease associations  
292 of the IL-17-induced changes in gene expression (padj<0.05, LFC>±1). The 25 most  
293 significantly associated diseases after IL-17A treatment in chondrocytes included juvenile  
294 arthritis, experimental arthritis, musculoskeletal diseases, anoxia, and hyperalgesia (Fig. 4A)  
295 In synovial fibroblasts the 25 most significantly associated diseases after IL-17A treatment  
296 included experimental arthritis, musculoskeletal diseases, and pain, but mostly included IL-  
297 17 associated diseases including lung disease, viral bronchiolitis, and respiratory syncytial  
298 virus infections (Fig. 4B). Although the 25 most significantly associated disease after IL-

299 17AF- and IL-17F treatment were similar to those induced by IL-17A, the gene counts were  
300 notably lower than the changes associated with IL-17A.

301

### 302 **3.5 IL-17A activates p38 and NF-κB pathways**

303 To better understand the similarities and differences between the signalling induced by IL-17  
304 cytokines, chondrocytes or synovial fibroblasts from end-stage OA patients were treated with  
305 control medium or 10ng/ml IL-17 for 10 minutes (Fig. 5), 30 mins, 1 hour, or 8 hours  
306 (Supplementary Fig. 7). Activation of the ERK1/2 (p44/p42 MAP kinases), p38 and p65 NF-  
307 κB intracellular cell signalling pathways was assessed by western blot analysis. Semi-  
308 quantitative analysis showed that IL-17A induced the strongest activation in p38 and NF-κB,  
309 followed by IL-17AF, with IL-17F causing only subtle activation. In contrast, ERK1/2 was  
310 most strongly activated by IL-17AF, followed by IL-17A and IL-17F which both caused  
311 no/minor increases.

312

### 313 **3.6 Secukinumab inhibits IL-17A-induced expression of OA-relevant genes**

314 The clinically-used IL-17A-antibody secukinumab was used to confirm that IL-17A drives  
315 the changes seen in expression of OA-relevant genes related to inflammation, matrix  
316 turnover, fibroblast activation, and intracellular signalling. Chondrocytes and synovial  
317 fibroblasts from end-stage OA patients were treated with 10ng/ml IL-17A for 24 hours  
318 without or with increasing, clinically-relevant concentrations of secukinumab (0.5, 5.0, and  
319 50 µg/ml), and changes in expression of 8 genes that were found to have been significantly  
320 changed by IL-17A in the RNA-Seq experiment were analysed with RT-qPCR. Secukinumab  
321 decreased the IL-17A-induced increase in gene expression for every gene tested in a dose-  
322 related manner (Fig. 6). In chondrocytes, 5 µg/ml secukinumab caused a statistically  
323 significant inhibition of IL-17A induced *MMP1* and *MAP3K8* mRNA expression, and 50  
324 µg/ml secukinumab was able to significantly inhibit IL-17A-induced gene expression for all  
325 genes tested. In synovial fibroblasts, 5 µg/ml secukinumab caused a statistically significant  
326 decrease in IL-17A-induced *IL6*, *PDPN*, and *NFKBIZ* mRNA expression, and 50 µg/ml  
327 secukinumab caused a statistically significant decrease in the IL-17A-induced gene  
328 expression of all genes tested except for *PDPN*. Inhibition of p38 or NF-κB p65 in end-stage  
329 OA chondrocytes or synovial fibroblasts did not significantly decrease IL-17A-induced genes  
330 in gene expression. These findings suggest that there is redundancy in IL-17A-induced  
331 intracellular signalling (Supplementary Fig. 8 and 9).

## 332 4 Discussion

333 There is a growing number of reports in clinical, animal, and genetic studies that support a  
334 role for IL-17 cytokines (including IL-17A, IL-17AF, and IL-17F) in OA. However, the  
335 specific effect IL-17 cytokines could have in OA disease pathophysiology remains unclear.  
336 Therefore, the overarching aim of this study was to investigate and compare the effect of IL-  
337 17A, IL-17AF, and IL-17F on the transcriptome and activation of intracellular signalling  
338 pathways in end-stage OA derived fibroblasts. The most active IL-17 cytokine identified, IL-  
339 17A, was then inhibited to assess its potential as a therapeutic option in OA.

340  
341 IL-17 cytokines induced changes in expression of diverse set of genes in both chondrocytes  
342 and synovial fibroblasts derived from end-stage OA patients. IL-17 targeted genes included  
343 those encoding signalling molecules, cytokines, and chemokines. Overall, IL-17A caused the  
344 strongest transcriptional response, followed by IL-17AF, and finally IL-17F. For most genes,  
345 IL-17AF-induced strength of response was closer to that of IL-17F than IL-17A, suggesting  
346 that the IL-17F-subunit strongly reduces its potential to induce transcriptional changes.  
347 However, the fact that not all genes followed this pattern underlines the complexity of IL-17-  
348 signalling and the likeliness that these cytokines have different roles[27, 40]. Therefore,  
349 further work should investigate the similarities and differences of the effects of these three  
350 cytokines and their potential role in the OA pathophysiology.

351  
352 Pathway analysis of the IL-17-induced genes revealed regulation of multiple cellular  
353 pathways including those related to immune responses, complement, and angiogenesis. Many  
354 of these pathways have been implicated in the development and/or progression of OA.  
355 DisGeNet analysis showed that especially IL-17A-induced changes in the transcriptome of  
356 chondrocytes and synovial fibroblasts are associated with juvenile arthritis, experimental  
357 arthritis, and musculoskeletal diseases, supporting that IL-17A could play an important role  
358 in OA. While IL-17AF- and IL-17F-induced transcriptional changes were also associated  
359 with these diseases, these associations the transcriptional changes were weaker for IL-17AF  
360 and IL-17F compared to IL-17A. Therefore, if these cytokines occur at similar concentrations  
361 in the joint, IL-17A is the most likely cytokine of this family to play a role in OA  
362 pathophysiology.

363  
364 Western blot analysis of the activation of intracellular signalling proteins was used to better  
365 understand the differences in IL-17-induced gene expression between IL-17A, IL-17AF, and

366 IL-17F. The intracellular signalling proteins p38 and NF- $\kappa$ B p65 were activated by IL-17  
367 cytokines, the extent of the activation mirrored the number of genes transcriptionally  
368 regulated by each of these cytokines in chondrocytes and synovial fibroblasts: IL-17A  
369 causing a relatively strong activation, IL-17AF causing a modest activation, and IL-17F  
370 causing a small activation. As the activation of NF- $\kappa$ B and p38 have led to increases  
371 inflammation in other types of fibroblasts[41, 42], these results are consistent with the IL-17-  
372 induced expression of immune-related genes seen in the RNA-Seq data. IL-17AF caused the  
373 activation of ERK1/2, with both IL-17A and IL-17F causing no/minor activation. In IL-17  
374 signalling in ST2 cells and mouse fibroblasts, ERK1/2 is not only able to induce transcription  
375 of IL-17A/F target genes, but it can also contribute to the negatively regulation of IL-17  
376 signalling by phosphorylating C/EBP $\beta$  which ultimately leads to the deubiquitylation of  
377 TRAF6, a protein that when ubiquitinated mediates MAPK and NF- $\kappa$ B signalling[43–46].  
378 Therefore, IL-17AF-induced activation of ERK1/2 in this study suggests there is a higher  
379 chance of ERK-dependent phosphorylation of C/EBP $\beta$ , leading to a stronger dampening of  
380 IL-17-induced signalling. However, better insight in the differential signalling of the three  
381 IL-17 cytokines in different cell types is needed to get a better understanding of their  
382 potential functions, which can be used to further unravel their potential role in promoting  
383 inflammation, influx of immune cells, and matrix destruction in OA.

384

385 As IL-17A is already a clinical target in other inflammatory (musculoskeletal) diseases,  
386 inhibition of IL-17A-induced gene expression was investigated. Inhibition of IL-17A-induced  
387 gene expression changes by the IL-17A antibody secukinumab confirmed that the expression  
388 of these genes is increased by IL-17A. As several clinical studies have demonstrated that OA  
389 patients have increased concentrations of IL-17A in their synovial fluid[12–17], our results  
390 suggest that secukinumab could be a potential therapeutic option for those OA patients with  
391 high concentrations of IL-17A in the OA joint.

392

393 The limitations of this study include the use only one concentration of IL-17 cytokines at  
394 only one time point for the gene expression studies. This concentration was selected based on  
395 dose-response curves but was necessary due to the limited availability of primary fibroblasts  
396 from OA patients. Future studies should study a range of concentrations over time to study  
397 the concentration- and time dependent effects of IL-17, which could especially be important  
398 as OA is a chronic disease that likely develops over several years or even decades. Lastly,

399 expression changes in RNA-Seq do not necessarily correlate to changes in protein expression.  
400 Therefore, it is crucial that future studies confirm that the IL-17-induced changes in gene  
401 expression that were seen in this study are translated into changes in protein expression and  
402 functional activity of hallmark pathways. This all will give more insight in the potential  
403 benefit of inhibitors of these IL-17 cytokines for OA patients with increased concentrations  
404 of IL-17 in OA joints.

405  
406 Future studies should determine the (relative) concentrations of IL-17 cytokines in the OA  
407 joint to determine which of these cytokines is likely to be most important in this disease. In  
408 addition, not only chondrocytes and synovial fibroblasts, but also fibroblasts and immune  
409 cells from other key joint tissues including meniscus and fat pad, should be used in isolation  
410 and in combination to look at the effect these cytokines could have across the joint organ.

411  
412 In conclusion, this study shows that IL-17A, and to a lower extent IL-17AF and IL-17F,  
413 induced changes in many genes that are linked to several OA pathophysiology-related  
414 pathways. While overall IL-17A caused the strongest transcriptional response, followed by  
415 IL-17AF and IL-17F, not all genes followed this pattern. The chronic, low-grade  
416 inflammation seen in OA fits well with the effects IL-17A on immune-related pathways.  
417 Disease-gene network analysis showed that IL-17A-induced changes in chondrocytes and  
418 synovial fibroblasts are associated with experimental arthritis, knee osteoarthritis, and  
419 musculoskeletal disease, which further highlights the potential importance of this cytokine in  
420 OA. The clinically-used IL-17A antibody secukinumab was able to significantly inhibit IL-  
421 17A-induced gene expression, confirming that IL-17A is responsible for these changes in  
422 gene expression. As there are currently no disease-modifying OA drugs, secukinumab should  
423 be investigated as a potential therapeutic option in (a subgroup of) patients with OA.

424 **Conflicts of interest**

425 The authors declare that the research was conducted in the absence of any commercial or  
426 financial relationships that could be construed as a potential conflict of interest.

427

428 **Author contributions**

429 Jolet Y. Mimpfen, Sarah J.B. Snelling, Mathew J. Baldwin, Stephanie G. Dakin, Adam P.  
430 Cribbs, and Andrew J. Carr contributed to the study conception and design. Material  
431 preparation, data collection and analysis were performed by Jolet Y. Mimpfen, Mathew J.  
432 Baldwin, Adam P. Cribbs, and Martin Philpott. The first draft of the manuscript was written  
433 by Jolet Y. Mimpfen and all authors commented on previous versions of the manuscript. All  
434 authors read and approved the final manuscript.

435

436 **Funding**

437 Jolet Y. Mimpfen and Sarah J.B. Snelling are funded by the National Institute for Health  
438 Research Oxford Biomedical Research Centre. Mathew J. Baldwin was funded by the  
439 Dunhill Foundation, Royal College of Surgeons, and Lord Nuffield Trust. Adam P. Cribbs  
440 was supported by the Medical Research Council, the Bone Cancer Research Trust, and the  
441 Leducq Foundation. Stephanie G. Dakin is funded by a Versus Arthritis Career Development  
442 Fellowship (22425). Andrew J. Carr receives funding from the Wellcome Trust, National  
443 Institute for Health Research, Medical Research Council/UK Research and Innovation, and  
444 Versus Arthritis.

445

446 **Acknowledgements**

447 The authors would like to thank Dr Ash Maroof (UCB) for providing the secukinumab for the  
448 inhibitor experiments. In addition, the authors would like to thank the Oxford  
449 Musculoskeletal Biobank, our research assistant Louise Appleton, research nurses Debra  
450 Beazley, Bridget Watkins, and Kim Wheway, and the knee surgeons Professor Andrew Price,  
451 Mr Nick Bottomley, Mr Will Jackson, and Mr Abtin Alvand for their invaluable help in  
452 obtaining the human tissue used for this study.

453

454 **Availability of data and material**

455 The dataset generated from the bulk RNA Sequencing experiment will be made available  
456 through the NCBI Gene Expression Omnibus, <https://www.ncbi.nlm.nih.gov/geo/>.



457 **References**

- 458 1. Man GS, Mologhianu G (2014) Osteoarthritis pathogenesis - a complex process that  
459 involves the entire joint. *J Med Life* 7:37–41
- 460 2. Poole AR (2012) Osteoarthritis as a whole joint disease. *HSS J* 8:4–6
- 461 3. Struglics A, Okroj M, Swärd P, Frobell R, Saxne T, Lohmander LS, Blom AM (2016)  
462 The complement system is activated in synovial fluid from subjects with knee injury  
463 and from patients with osteoarthritis. *Arthritis Res Ther* 18:223
- 464 4. Silawal S, Triebel J, Bertsch T, Schulze-Tanzil G (2018) Osteoarthritis and the  
465 Complement Cascade. *Clin Med Insights Arthritis Musculoskelet Disord*  
466 11:1179544117751430
- 467 5. Robinson WH, Lepus CM, Wang Q, Raghu H, Mao R, Lindstrom TM, Sokolove J  
468 (2016) Low-grade inflammation as a key mediator of the pathogenesis of  
469 osteoarthritis. *Nat Rev Rheumatol* 12:580–592
- 470 6. Mapp PI, Walsh DA (2012) Mechanisms and targets of angiogenesis and nerve growth  
471 in osteoarthritis. *Nat Rev Rheumatol* 8:390–8
- 472 7. MacDonald I, Liu S-C, Su C-M, Wang Y-H, Tsai C-H, Tang C-H (2018) Implications  
473 of Angiogenesis Involvement in Arthritis. *Int J Mol Sci* 19:2012
- 474 8. Hymowitz SG, Filvaroff EH, Yin J, Lee J, Cai L, Risser P, Maruoka M, Mao W,  
475 Foster J, Kelley RF, Pan G, Gurney AL, De Vos AM, Starovasnik MA (2001) IL-17s  
476 adopt a cystine knot fold: Structure and activity of a novel cytokine, IL-17F, and  
477 implications for receptor binding. *EMBO J* 20:5332–5341
- 478 9. Kawaguchi M, Onuchic LF, Li X-D, Essayan DM, Schroeder J, Xiao H-Q, Liu MC,  
479 Krishnaswamy G, Germino G, Huang S-K (2001) Identification of a Novel Cytokine,  
480 ML-1, and Its Expression in Subjects with Asthma. *J Immunol* 167:4430–4435
- 481 10. Starnes T, Robertson MJ, Sledge G, Kelich S, Nakshatri H, Broxmeyer HE, Hromas R  
482 (2001) Cutting Edge: IL-17F, a Novel Cytokine Selectively Expressed in Activated T  
483 Cells and Monocytes, Regulates Angiogenesis and Endothelial Cell Cytokine  
484 Production. *J Immunol* 167:4137–4140
- 485 11. Wright JF, Bennett F, Li B, Brooks J, Luxenberg DP, Whitters MJ, Tomkinson KN,  
486 Fitz LJ, Wolfman NM, Collins M, Dunussi-Joannopoulos K, Chatterjee-Kishore M,  
487 Carreno BM (2008) The Human IL-17F/IL-17A Heterodimeric Cytokine Signals  
488 through the IL-17RA/IL-17RC Receptor Complex. *J Immunol* 181:2799–2805
- 489 12. Liu Y, Peng H, Meng Z, Wei M (2015) Correlation of IL-17 Level in Synovia and  
490 Severity of Knee Osteoarthritis. *Med Sci Monit* 21:1732–6

- 491 13. Mohamed SA, Neseem NO, Metwally SS, Dein M Farag S El (2018) IL-17 in primary  
492 knee osteoarthritis and its relation with severity of the disease. *Int J Clin Rheumtol*.  
493 <https://doi.org/10.4172/1758-4272.1000212>
- 494 14. Askari A, Naghizadeh MM, Homayounfar R, Shahi A, Afsarian MH, Paknahad A,  
495 Kennedy D, Ataollahi MR, Kapoor M, Martel-Pelletier J, Lajeunesse D, Pelletier J,  
496 Fahmi H, Lories R, Luyten F, Felson D, Massicotte F, Lajeunesse D, Benderdour M, et  
497 al (2016) Increased Serum Levels of IL-17A and IL-23 Are Associated with Decreased  
498 Vitamin D3 and Increased Pain in Osteoarthritis. *PLoS One* 11:e0164757
- 499 15. Wang GL, Mu WD (2017) IL-17 expression in synovial fluid and synovial membrane  
500 in patients with knee osteoarthritis. *Int J Clin Exp Med* 10:3400–3405
- 501 16. Deligne C, Casulli S, Pigenet A, Bougault C, Campillo-Gimenez L, Nourissat G,  
502 Berenbaum F, Elbim C, Houard X (2015) Differential expression of interleukin-17 and  
503 interleukin-22 in inflamed and non-inflamed synovium from osteoarthritis patients.  
504 *Osteoarthritis Cartilage* 23:1843–52
- 505 17. Snelling SJB, Bas S, Puskas GJ, Dakin SG, Suva D, Finckh A, Gabay C, Hoffmeyer P,  
506 Carr AJ, Lübbecke A (2017) Presence of IL-17 in synovial fluid identifies a potential  
507 inflammatory osteoarthritic phenotype. *PLoS One* 12:e0175109
- 508 18. Bai Y, Gao S, Liu Y, Jin S, Zhang H, Su K (2019) Correlation between Interleukin-17  
509 gene polymorphism and osteoarthritis susceptibility in Han Chinese population. *BMC*  
510 *Med Genet* 20:20
- 511 19. Eftedal R, Vrgoc G, Jotanovic Z, Dembic Z (2019) Alternative Interleukin 17A/F  
512 Locus Haplotypes are Associated With Increased Risk to Hip and Knee Osteoarthritis.  
513 *J Orthop Res* 37:jor.24334
- 514 20. Wang Z, Zheng C, Zhong Y, He J, Cao X, Xia H, Ba H, Li P, Wu S, Peng C (2017)  
515 Interleukin-17 Can Induce Osteoarthritis in Rabbit Knee Joints Similar to Hulth's  
516 Method. *Biomed Res Int* 2017:1–11
- 517 21. Toy D, Kugler D, Wolfson M, Vanden Bos T, Gurgel J, Derry J, Tocker J, Peschon J  
518 (2006) Cutting edge: interleukin 17 signals through a heteromeric receptor complex. *J*  
519 *Immunol* 177:36–9
- 520 22. Kuestner RE, Taft DW, Haran A, Brandt CS, Brender T, Lum K, Harder B, Okada S,  
521 Ostrander CD, Kreindler JL, Aujla SJ, Reardon B, Moore M, Shea P, Schreckhise R,  
522 Bukowski TR, Presnell S, Guerra-Lewis P, Parrish-Novak J, et al (2007) Identification  
523 of the IL-17 receptor related molecule IL-17RC as the receptor for IL-17F. *J Immunol*  
524 179:5462–73

- 525 23. Wright JF, Guo Y, Quazi A, Luxenberg DP, Bennett F, Ross JF, Qiu Y, Whitters MJ,  
526 Tomkinson KN, Dunussi-Joannopoulos K, Carreno BM, Collins M, Wolfman NM  
527 (2007) Identification of an Interleukin 17F/17A Heterodimer in Activated Human  
528 CD4+ T Cells. *J Biol Chem* 282:13447–13455
- 529 24. Chang SH, Dong C (2007) A novel heterodimeric cytokine consisting of IL-17 and IL-  
530 17F regulates inflammatory responses. *Cell Res* 17:435
- 531 25. Yao Z, Fanslow WC, Seldin MF, Rousseau AM, Painter SL, Comeau MR, Cohen JI,  
532 Spriggs MK (1995) Herpesvirus Saimiri encodes a new cytokine, IL-17, which binds  
533 to a novel cytokine receptor. *Immunity* 3:811–821
- 534 26. Ha H-L, Wang H, Pisitkun P, Kim J-C, Tassi I, Tang W, Morasso MI, Udey MC,  
535 Siebenlist U (2014) IL-17 drives psoriatic inflammation via distinct, target cell-  
536 specific mechanisms. *Proc Natl Acad Sci* 111:E3422–E3431
- 537 27. McGeachy MJ, Cua DJ, Gaffen SL (2019) The IL-17 Family of Cytokines in Health  
538 and Disease. *Immunity* 50:892–906
- 539 28. Honorati MC, Bovara M, Cattini L, Piacentini A, Facchini A (2002) Contribution of  
540 interleukin 17 to human cartilage degradation and synovial inflammation in  
541 osteoarthritis. *Osteoarthr Cartil* 10:799–807
- 542 29. Shalom-Barak T, Quach J, Lotz M (1998) Interleukin-17-induced gene expression in  
543 articular chondrocytes is associated with activation of mitogen-activated protein  
544 kinases and NF- $\kappa$ B. *JBiol Chem* 273:27467–27473
- 545 30. Benderdour M, Tardif G, Pelletier J-P, Di Battista JA, Reboul P, Ranger P, Martel-  
546 Pelletier J (2002) Interleukin 17 (IL-17) induces collagenase-3 production in human  
547 osteoarthritic chondrocytes via AP-1 dependent activation: differential activation of  
548 AP-1 members by IL-17 and IL-1 $\beta$ . *J Rheumatol* 29:1262–72
- 549 31. Cribbs AP, Luna-Valero S, George C, Sudbery IM, Berlanga-Taylor AJ, Sansom SN,  
550 Smith T, Ilott NE, Johnson J, Scaber J, Brown K, Sims D, Heger A (2019) CGAT-  
551 core: a python framework for building scalable, reproducible computational biology  
552 workflows. *F1000Research* 8:377
- 553 32. Love MI, Huber W, Anders S (2014) Moderated estimation of fold change and  
554 dispersion for RNA-seq data with DESeq2. *Genome Biol* 15:550
- 555 33. Zhu A, Ibrahim JG, Love MI (2019) Heavy-tailed prior distributions for sequence  
556 count data: removing the noise and preserving large differences. *Bioinformatics*  
557 35:2084–2092
- 558 34. Wickham H (2016) *ggplot2: Elegant Graphics for Data Analysis*. Springer-Verlag

- 559 New York. <https://doi.org/10.18637/jss.v035.b01>
- 560 35. Yu G, Wang L-G, Han Y, He Q-Y (2012) clusterProfiler: an R package for comparing  
561 biological themes among gene clusters. *OMICS* 16:284–7
- 562 36. Yu G, Wang L-G, Yan G-R, He Q-Y (2015) DOSE: an R/Bioconductor package for  
563 disease ontology semantic and enrichment analysis. *Bioinformatics* 31:608–9
- 564 37. Morita W, Snelling SJB, Wheway K, Watkins B, Appleton L, Carr AJ, Dakin SG  
565 (2019) ERK1/2 drives IL-1 $\beta$ -induced expression of TGF- $\beta$ 1 and BMP-2 in torn  
566 tendons. *Sci Rep* 9:19005
- 567 38. Livak KJ, Schmittgen TD (2001) Analysis of Relative Gene Expression Data Using  
568 Real-Time Quantitative PCR and the 2 $^{-\Delta\Delta CT}$  Method. *Methods* 25:402–408
- 569 39. Liberzon A, Birger C, Thorvaldsdóttir H, Ghandi M, Mesirov JP, Tamayo P (2015)  
570 The Molecular Signatures Database Hallmark Gene Set Collection. *Cell Syst* 1:417–  
571 425
- 572 40. Li X, Bechara R, Zhao J, McGeachy MJ, Gaffen SL (2019) IL-17 receptor–based  
573 signaling and implications for disease. *Nat Immunol* 20:1594–1602
- 574 41. Li M, Georgakopoulos D, Lu G, Hester L, Kass DA, Hasday J, Wang Y (2005) p38  
575 MAP kinase mediates inflammatory cytokine induction in cardiomyocytes and  
576 extracellular matrix remodeling in heart. *Circulation* 111:2494–2502
- 577 42. Liu T, Zhang L, Joo D, Sun SC (2017) NF- $\kappa$ B signaling in inflammation. *Signal*  
578 *Transduct Target Ther* 2:17023
- 579 43. Shen F, Li N, Gade P, Kalvakolanu D V., Weibley T, Doble B, Woodgett JR, Wood  
580 TD, Gaffen SL (2009) IL-17 Receptor Signaling Inhibits C/EBP  $\beta$  by Sequential  
581 Phosphorylation of the Regulatory 2 Domain. *Sci Signal* 2:ra8–ra8
- 582 44. Garg A V., Ahmed M, Vallejo AN, Ma A, Gaffen SL (2013) The Deubiquitinase A20  
583 Mediates Feedback Inhibition of Interleukin-17 Receptor Signaling. *Sci Signal* 6:ra44–  
584 ra44
- 585 45. Gaffen SL, Jain R, Garg A V., Cua DJ (2014) The IL-23–IL-17 immune axis: from  
586 mechanisms to therapeutic testing. *Nat Rev Immunol* 14:585–600
- 587 46. Amatya N, Garg A V., Gaffen SL (2017) IL-17 Signaling: The Yin and the Yang.  
588 *Trends Immunol* 38:310–322
- 589

590 **Figures**

591

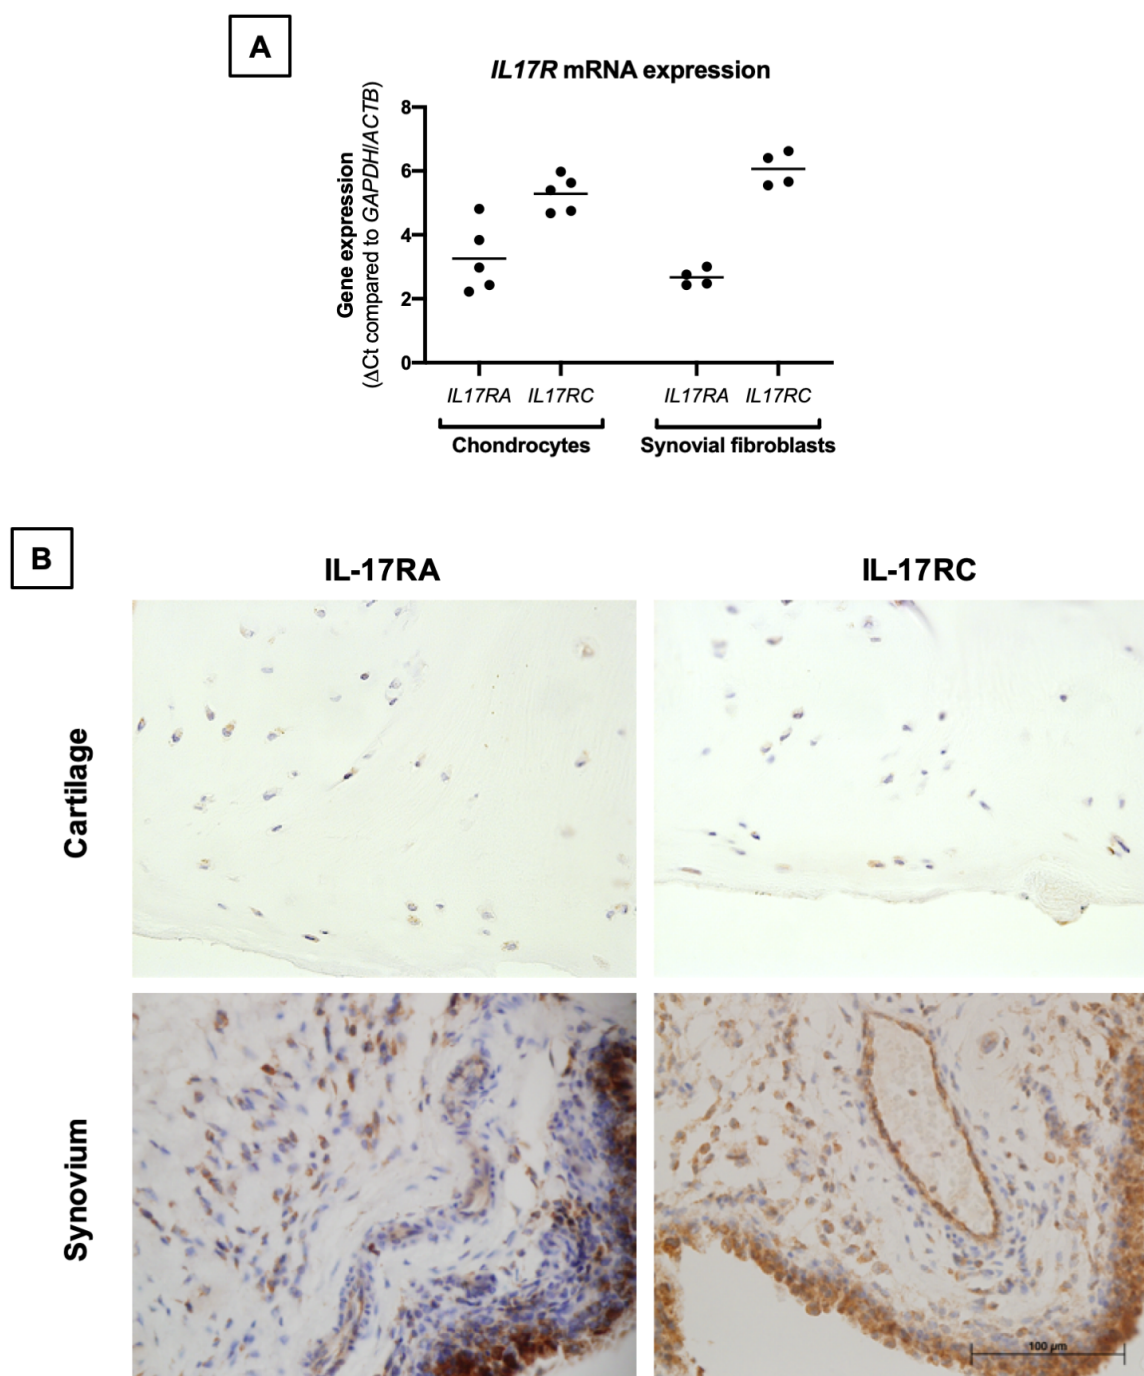

592

593 **Figure 1.** Expression of IL-17 receptor A (IL-17RA) and IL-17RC in end-stage OA. (A)  
594 mRNA expression of *IL17RA* and *IL17RC* in primary cultured chondrocytes (n=5) and  
595 synovial fibroblasts (n=4). Gene expression was calculated using the dCT-method using both  
596 *GAPDH* and *ACTB* as housekeeper. (B) Protein expression of IL-17RA and IL-17RC in end-  
597 stage OA cartilage and synovium. Antibodies were visualised with DAB (brown) and  
598 counterstained with haematoxylin (blue). Images were taken at 40x magnification.

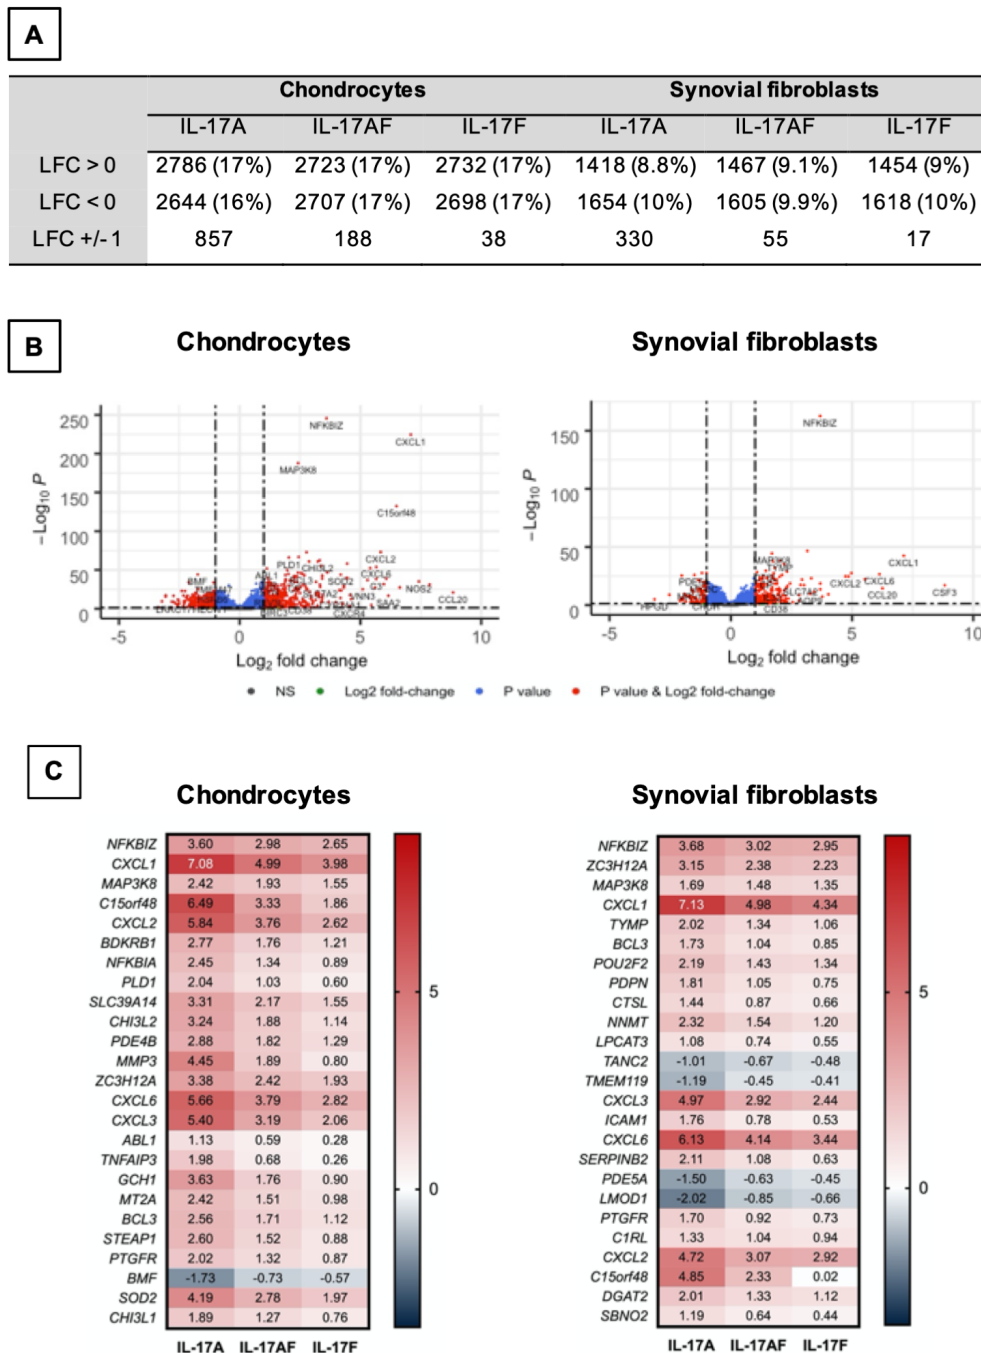

599

600 **Figure 2.** Changes in gene expression after treatment with IL-17A, IL-17AF, or IL-17F  
 601 compared to vehicle control measured by bulk RNA-Seq. (A) Overview of changes induced  
 602 by IL-17 cytokines ( $p_{adj} < 0.05$ ). (B) Volcano plots showing the changes in gene expression  
 603 after treatment with IL-17A in chondrocytes (left) and synovial fibroblasts (right). Grey =  
 604 not significant (NS); green = Log2 fold change of at least 1 or -1, but  $p > 0.05$ ; blue = p-value  
 605  $< 0.05$ , but log2 fold change  $> -1$  and  $< 1$ ; red = p-value  $< 0.05$  and log2 fold change of at least  
 606 -1 or +1. (C) Heatmap of the 25 most significantly differentially expressed genes by  
 607 chondrocytes (left) and synovial fibroblasts (right). Red = upregulated, blue =  
 608 downregulated. n=6

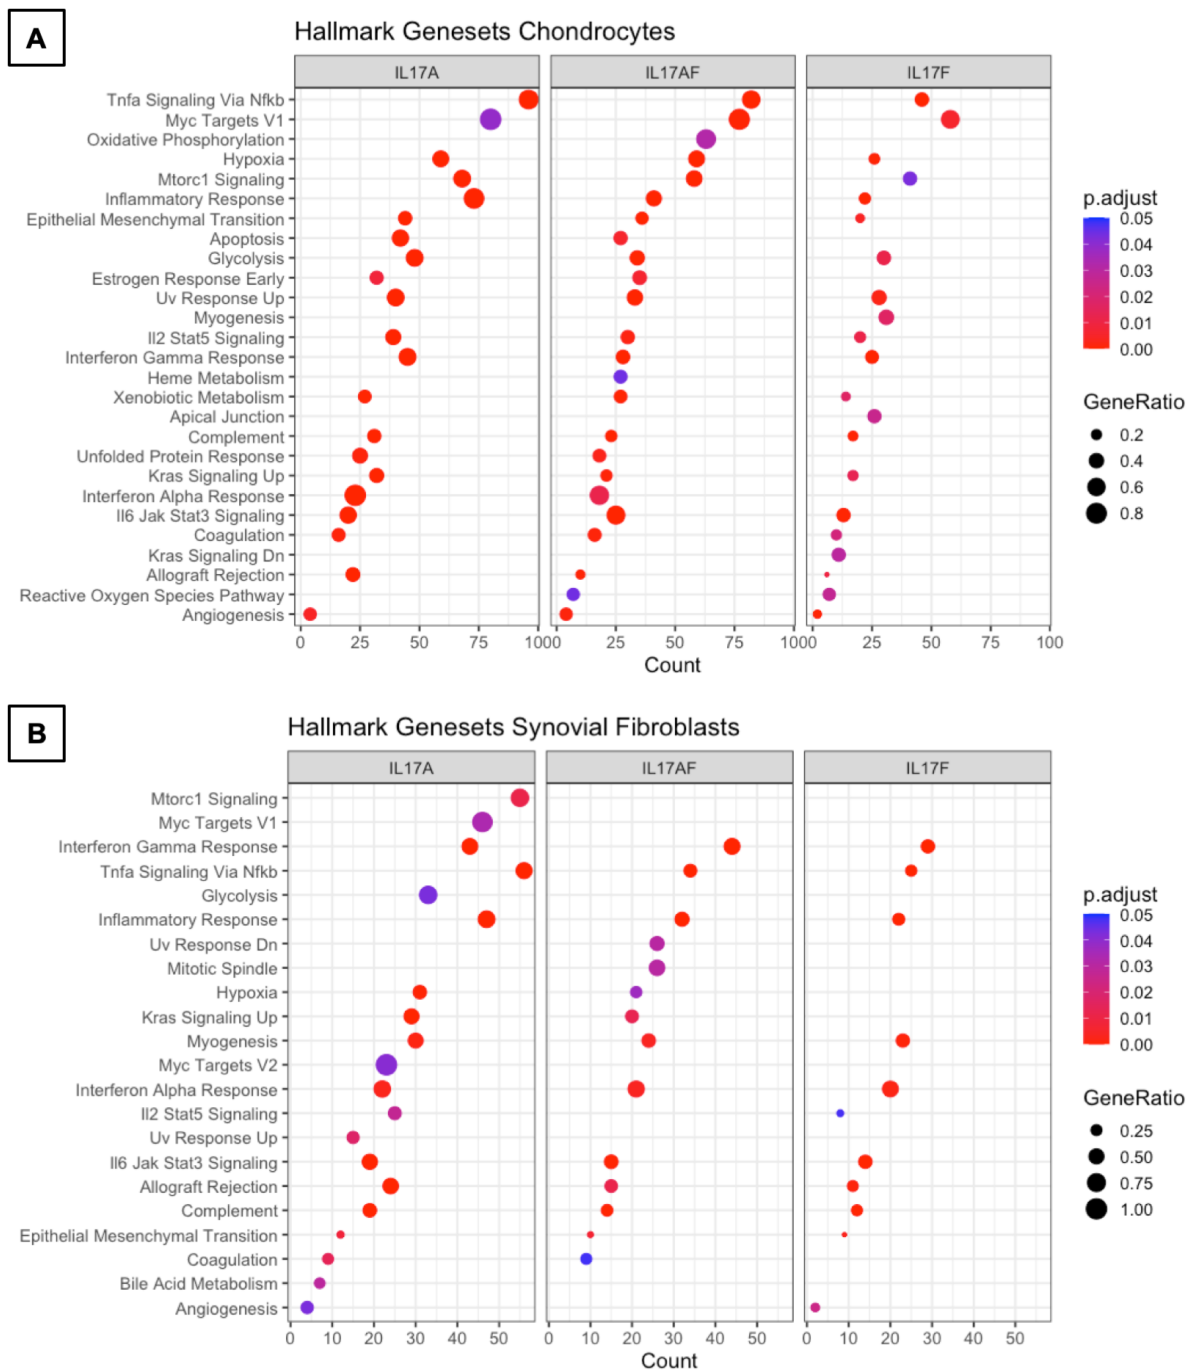

609

610 **Figure 3.** Results from GSEA Hallmark pathway analysis. Dot plots representing the changes  
 611 in GSEA hallmark pathways after IL-17A, IL-17AF, and IL-17F treatment in (A)

612 chondrocytes and (B) synovial fibroblasts, including the gene ratio (ratio of DEG over the

613 total number of genes in pathway), gene count (number of DEG in pathway), and the adjusted

614 p-value.

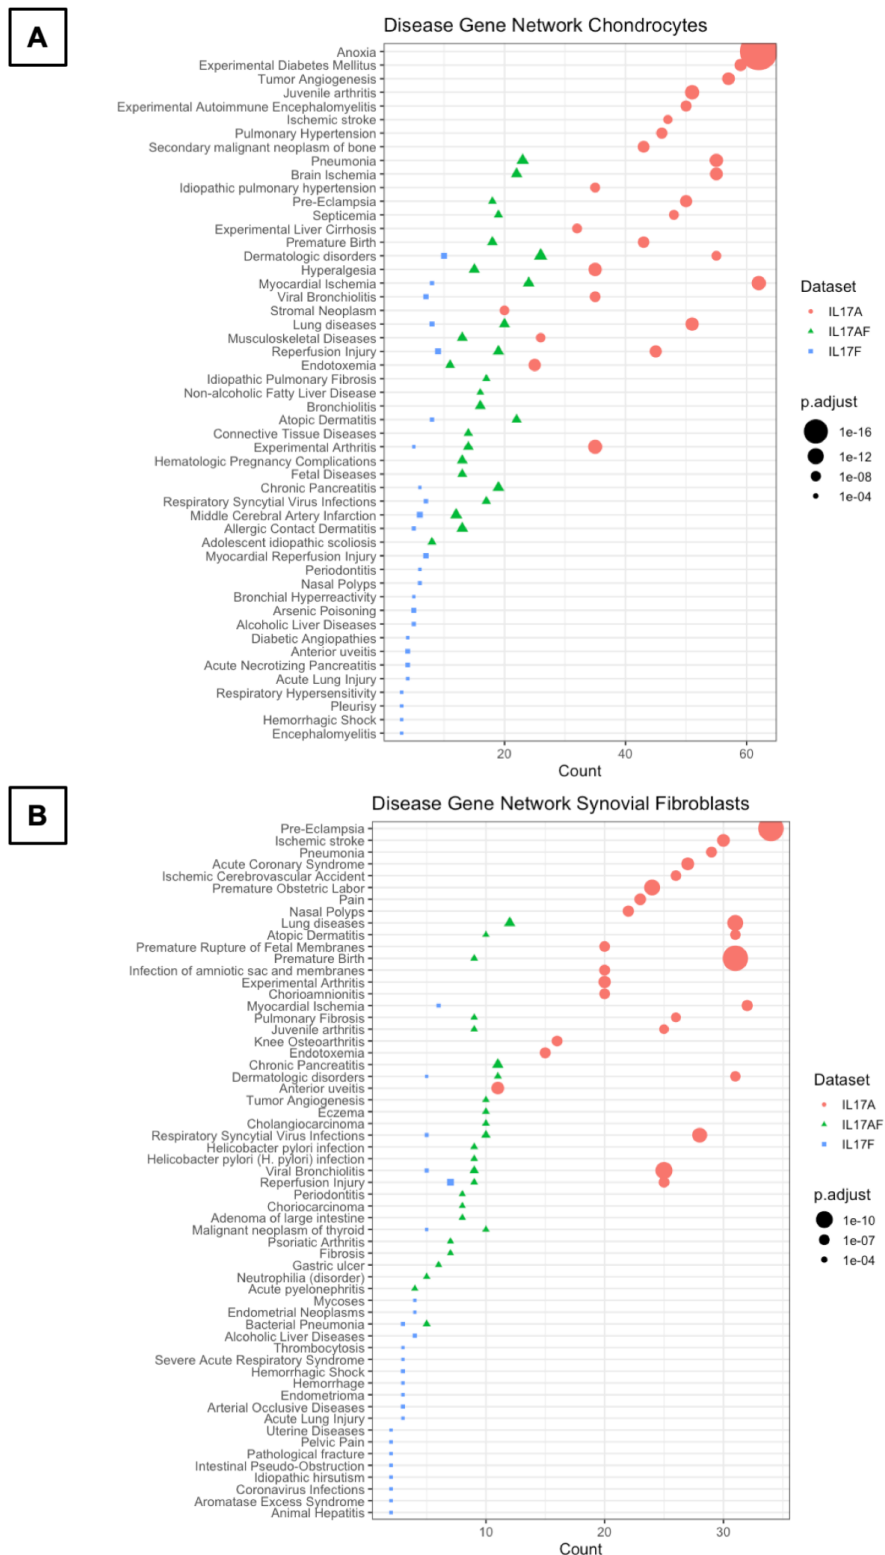

615

616 **Figure 4.** Results from Disease-Gene Network (DiGeNeT) in (A) chondrocytes and (B)  
 617 synovial fibroblasts. Dotplots displaying 25 most significantly associated disease gene sets  
 618 with the differently expressed genes (DEGs) ( $p_{adj} < 0.05$ ,  $LFC \pm 1$ ) after treatment with IL-17A  
 619 (coral), IL-17AF (green), and IL-17F (blue), including gene count (number of DEG in each  
 620 disease geneset) and the adjusted p-value.



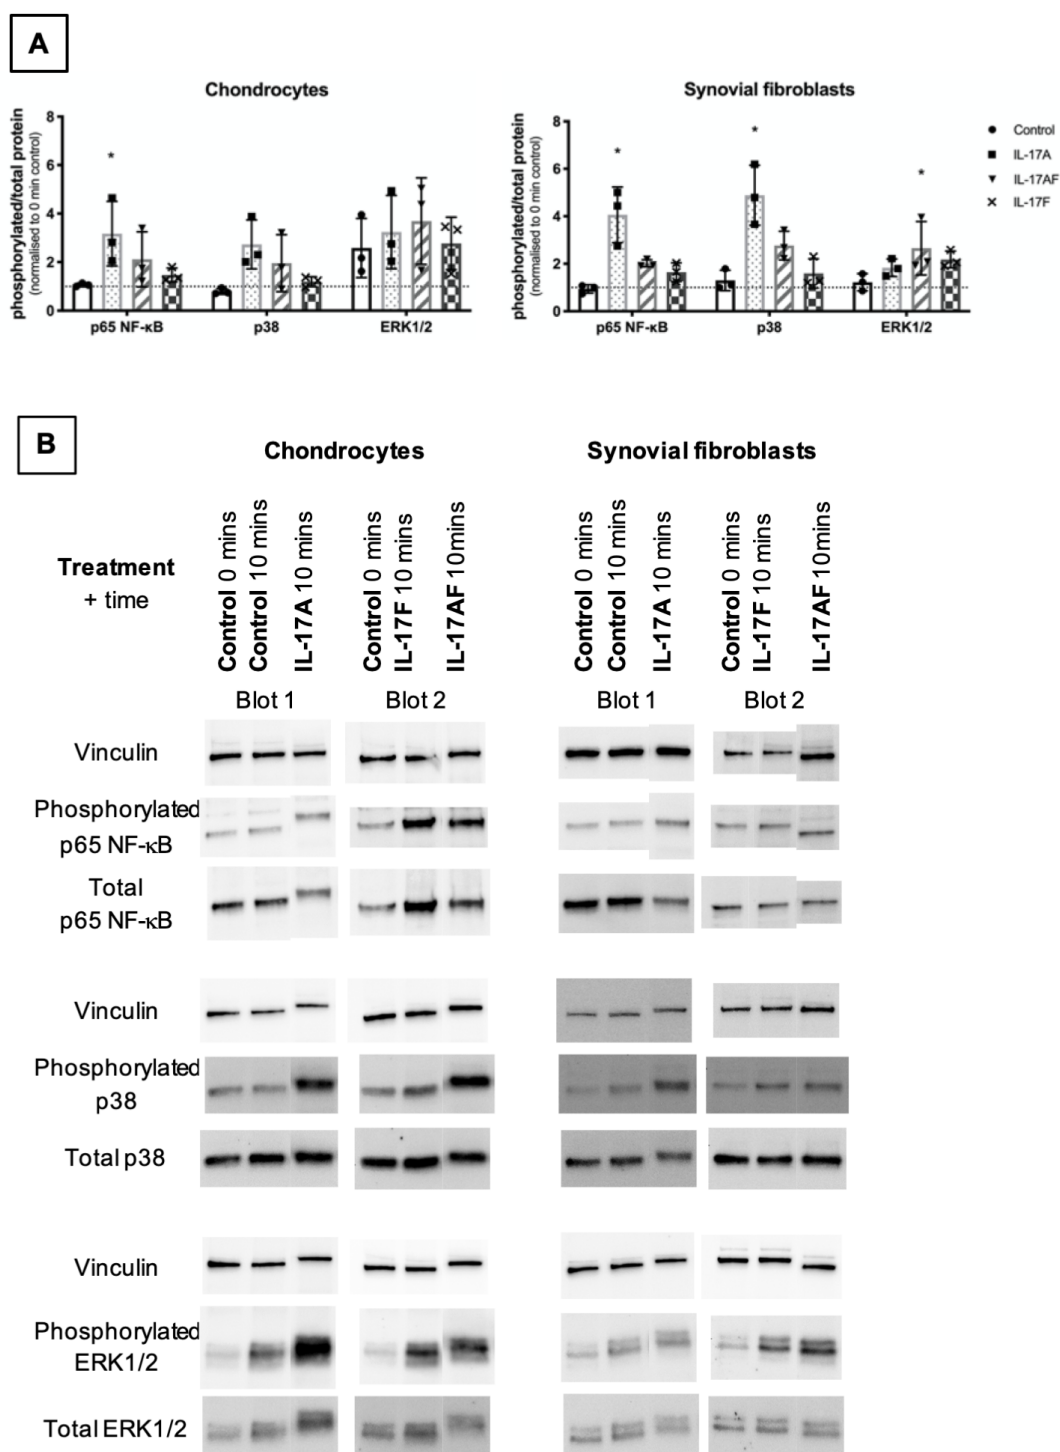

621

622 **Figure 5.** Activation of p65 NF- $\kappa$ B, p38 MAP kinase, and ERK1/2 (p44/p42 MAP kinases)  
 623 in chondrocytes and synovial fibroblasts by IL-17A, IL-17AF, and IL-17F (all 10 ng/ml) after  
 624 10 minutes stimulation. (A) Relative ratio of phosphorylated protein over total protein  
 625 compared to baseline control (0 mins). Friedman test for each intracellular protein with  
 626 Dunn's multiple comparisons test. Mean $\pm$ SD. N=3. \* =  $p < 0.05$ , \*\* =  $p < 0.01$ , \*\*\* =  $p < 0.001$ ,  
 627 \*\*\*\* =  $p < 0.0001$ . (B) Representative western blots for vinculin (loading control),  
 628 phosphorylated, and total protein of each intracellular signalling protein.

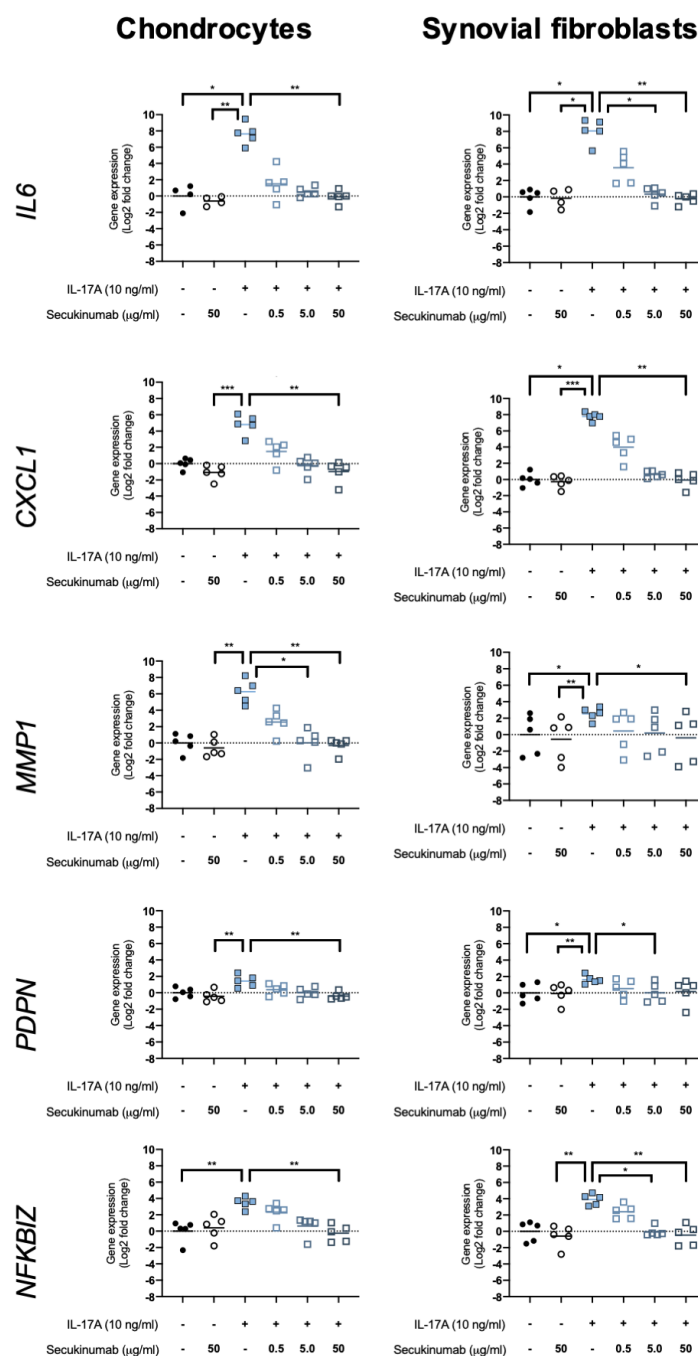

629  
 630 **Figure 6.** Gene expression of chondrocytes and synovial fibroblasts after treatment with IL-  
 631 17A (10 ng/ml) with or without clinically-used IL-17A-antibody secukinumab in different  
 632 concentrations (0.5, 5.0, or 50 µg/ml). Gene expression was calculated using the ddCT-  
 633 method using both *GAPDH* and *ACTB* as housekeepers. Gene expression is expressed as log<sub>2</sub>  
 634 fold change compared to control. Changes in gene expression were calculated comparing  
 635 each treatment to IL-17A treatment alone. Kruskal-Wallis test with Dunn's multiple  
 636 comparisons test (*IL6*). Friedman test with Dunn's multiple comparisons test (all other  
 637 genes). Individual values and mean. N=5. \* = p<0.05, \*\* = p<0.01, \*\*\* = p<0.001, \*\*\*\* =  
 638 p<0.0001.
